# Supplementary material for: Dissolution of feather keratin in ionic liquids
Source: Royal Society of Chemistry journal article supplement (doi:10.1039/c2gc36556a), 2012-12-13
Supplement: c2gc36556a.pdf [file c2gc36556a.pdf]

## Supplementary Information

### Preparation of ionic liquids

1-allyl-3-methylimidazolium chloride [AMIM]Cl was prepared according to the literature<sup>1</sup>

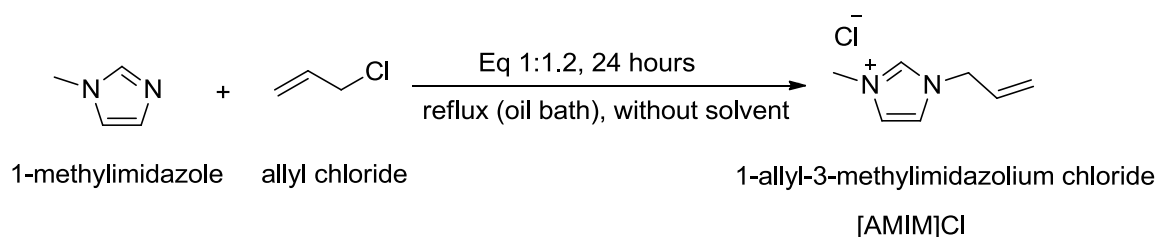

**Scheme S1.** Preparation of [AMIM]Cl

Allylchloride (30.8 ml, 0.378 moles) and *N*-methylimidazole (25.1 ml, 0.315 moles) were inserted in a three neck round bottom flask via a syringe. The three neck round bottom flask equipped with a reflux condenser and a magnetic stirrer was flushed with nitrogen for 10 mins beforehand. The mixture was stirred at 50°C to 60°C for 24 hours. Evaporation of excess allylchloride under *vacuo* gave the product, a viscous liquid (**Scheme S1**) displaying a slight amber colour (48.695 g, 97%); <sup>1</sup>H NMR (ppm, 400 MHz, CD<sub>3</sub>OD) δ<sub>H</sub>: 9.00 (1H, s, ArH), 7.62 (2H, s, ArH), 6.08 (1H, m, CH), 5.43 (2H, m, CH<sub>2</sub>), 4.87 (2H, d, CH<sub>2</sub>), 3.96 (3H, s, CH<sub>3</sub>); <sup>13</sup>C NMR (ppm, 400 MHz, CDCl<sub>3</sub>) δ<sub>C</sub>: 138.0, 132.1, 125.1, 123.6, 121.9, 52.8, 36.6; ES-MS: ES<sup>+</sup> *m/z* 123.1 [AMIM]<sup>+</sup>. ES<sup>-</sup> *m/z* 35.1 [Cl]<sup>-</sup>. Water content (Karl Fischer): 16234.ppm

### Dissolution of keratin in ionic liquids

**Table S1.** Solubility of turkey feather in ionic liquids

| Ils                                       | Condition/°C | Time/H | Solubility (wt% ± 1) | Appearance       |
|-------------------------------------------|--------------|--------|----------------------|------------------|
| [BMIM]Cl                                  | 130          | 10     | 50                   | soluble, viscous |
| [AMIM]Cl                                  | 130          | 10     | 50                   | soluble, viscous |
| [Choline][thioglycolate]                  | 130          | 10     | 45                   | soluble, viscous |
| [Bis-2-ethylhexylammonium][thioglycolate] | 130          | 10     | -                    | Insoluble        |

## Regenerated keratin from ionic liquids

**Table S2.** Mass of regenerated turkey feather from dissolution in ionic liquids

| Ils                                       | Mass of turkey feather dissolved (mg) | Mass of regenerated turkey feather (mg) | Mass of regenerated turkey feather (% $\pm$ 1) |
|-------------------------------------------|---------------------------------------|-----------------------------------------|------------------------------------------------|
| [BMIM]Cl                                  | 500.0                                 | 293.5                                   | 59                                             |
| [AMIM]Cl                                  | 500.0                                 | 287.2                                   | 57                                             |
| [Choline][thioglycolate]                  | 450.0                                 | 230.1                                   | 51                                             |
| [Bis-2-ethylhexylammonium][thioglycolate] | -                                     | -                                       | -                                              |

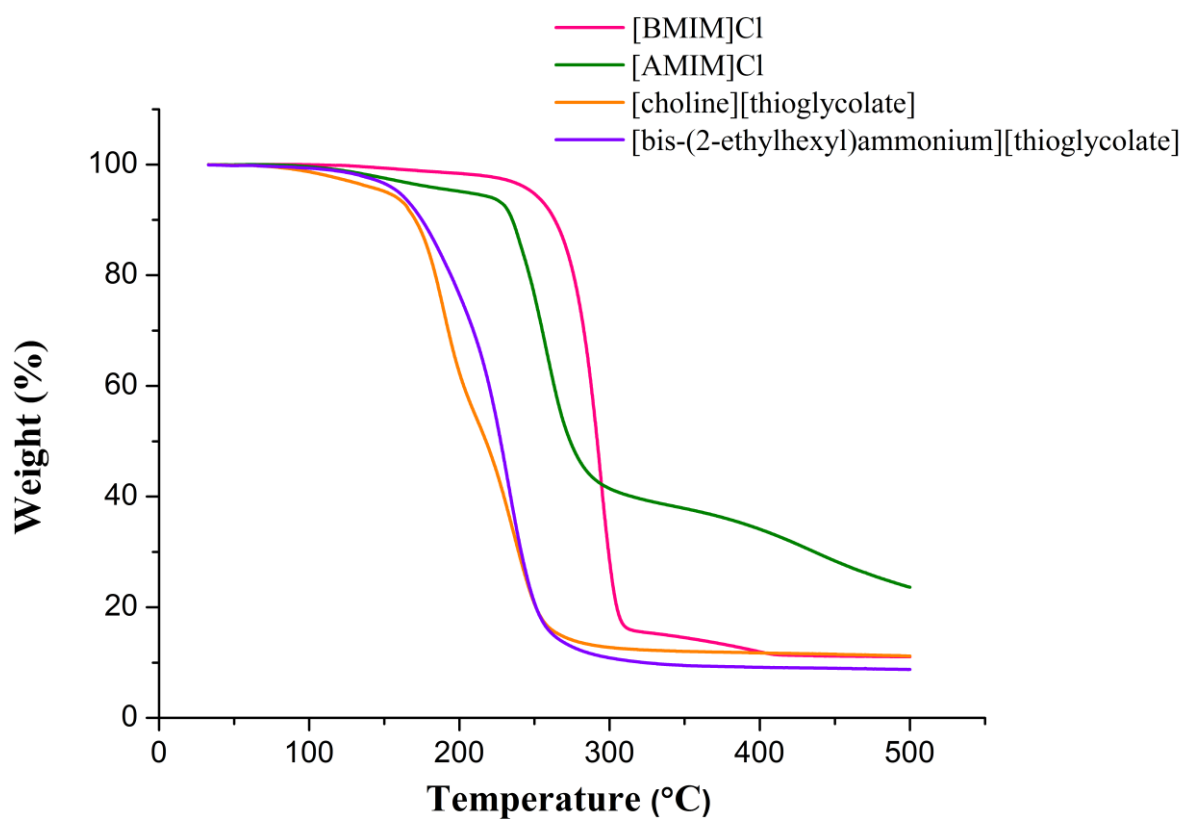

**Figure S1.** Single heating scan TGA traces of neat ionic liquids
